# Supplementary material for: Sovereign Wealth Funds as Sustainability Instruments? Disclosure of Sustainability Criteria in Worldwide Comparison
Source: MDPI journal article supplement (doi:10.3390/su13105565), 2021-05-17
Supplement: s1 [file s1]

|                               | <i>Dependent variable:</i> |                    |                     |                    |                     |
|-------------------------------|----------------------------|--------------------|---------------------|--------------------|---------------------|
|                               | environmental_score        | social_score       | governance_score    | economic_score     | overall_score       |
|                               | (1)                        | (2)                | (3)                 | (4)                | (5)                 |
| e_migdppe                     | -0.008<br>(0.008)          | -0.003<br>(0.009)  | -0.002<br>(0.011)   | -0.006<br>(0.009)  | -0.018<br>(0.031)   |
| crude_oil_exports             | -0.003<br>(0.002)          | -0.001<br>(0.002)  | -0.0002<br>(0.002)  | -0.003<br>(0.002)  | -0.007<br>(0.007)   |
| pop_ages_over_65              | 0.007<br>(0.036)           | -0.006<br>(0.040)  | 0.014<br>(0.048)    | 0.027<br>(0.041)   | 0.041<br>(0.137)    |
| v2x_polyarchy                 | 0.264<br>(0.548)           | 0.398<br>(0.611)   | -0.724<br>(0.736)   | -0.031<br>(0.631)  | -0.093<br>(2.092)   |
| e_wbgi_gee                    | 0.469<br>(0.245)           | 0.419<br>(0.273)   | 1.224***<br>(0.329) | 0.572*<br>(0.282)  | 2.684**<br>(0.936)  |
| IFSWF_membership              | 0.765**<br>(0.274)         | 0.916**<br>(0.305) | 2.043***<br>(0.367) | 0.910**<br>(0.315) | 4.634***<br>(1.043) |
| Constant                      | 0.076<br>(0.414)           | 0.484<br>(0.461)   | 1.062<br>(0.556)    | 0.171<br>(0.476)   | 1.793<br>(1.580)    |
| Observations                  | 65                         | 65                 | 65                  | 65                 | 65                  |
| R <sup>2</sup>                | 0.184                      | 0.191              | 0.518               | 0.220              | 0.369               |
| Adjusted R <sup>2</sup>       | 0.099                      | 0.108              | 0.469               | 0.140              | 0.303               |
| Residual Std. Error (df = 58) | 0.997                      | 1.110              | 1.337               | 1.146              | 3.801               |
| F Statistic (df = 6; 58)      | 2.174                      | 2.289*             | 10.406***           | 2.731*             | 5.643***            |

*Note:*

Signif. codes: '\*\*\*' p < 0.001, '\*\*' p < 0.01, '\*' p < 0.05
