# Supplementary material for: Sovereign Wealth Funds as Sustainability Instruments? Disclosure of Sustainability Criteria in Worldwide Comparison
Source: MDPI journal article supplement (doi:10.3390/su13105565), 2021-05-17
Supplement: s1 [file s1]

## Independent Variables

| Variable                                                   | Description of Operationalization                                                    | Variable Name in Regression | Data obtained from     |
|------------------------------------------------------------|--------------------------------------------------------------------------------------|-----------------------------|------------------------|
| Structure of the fund (Pension Fund Mandate or other SWFs) | Binary encoding for the presence or absence of a pension fund mandate                | no_pension_fund             | Official SWF Documents |
| Size of the fund                                           | Assets under management (AUM) in 1000 billions of USD                                | AUM                         | [1][2]                 |
| Origin of Fund                                             | Binary Encoding capturing whether the fund is commodity-based or non-commodity-based | origin_of_funding           | [1]                    |
| Economic Status of Country of Origin                       | GDP/capita in 1000 USD                                                               | e_migdppc                   | [3][4]                 |
| Natural Resource Wealth of Country of Origin               | Crude oil exports in 1000 ktoe                                                       | crude_oil_exports           | [5]                    |
| Demography of Country of Origin                            | Percentage of population aged 0 to 14 years                                          | pop_ages_0_14               | [6]                    |
| Electoral Democracy                                        | Electoral democracy index on a scale of 0 to 1                                       | v2x_polyarchy               | [3]                    |
| State Capacity                                             | Governance effectiveness on a scale of -2.5 to +2.5                                  | e_wbgi_gee                  | [3][7]                 |
| IFSWF Membership (Santiago Principles)                     | Binary encoding for the presence or absence of the IFSWF membership                  | IFSWF_membership            | [8]                    |

1. Boubakri, N.; Cosset, J.-C.; Grira, J. Sovereign Wealth Funds Targets Selection: A Comparison With Pension Funds. *Journal of International Financial Markets, Institutions and Money* **2016**, *42*, 60-76; DOI:10.1016/j.intfin.2016.01.004.
2. Blundell-Wignall, A.; Hu, Y.-W.; Yermo, J. Sovereign Wealth and Pension Fund Issues. *OECD Working Papers on Insurance and Private Pensions* **2008**, *14*; DOI:10.1787/243287223503.
3. Coppedge, M.; Gerring, J.; Knutsen, C. H.; Lindberg, S. I.; Teorell, J.; Altman, D.; Bernhard, M.; Fish, M. S.; Glynn, A.; Hicken, A.; Lüthmann, A.; Marquardt, K. L.; McMann, K.; Paxton, P.; Pemstein, D.; Seim, B.; Sigman, R.; Skaaning, S.-E.; Staton, J.; . . . ; Ziblatt, D. V-Dem Country-Year Dataset v10. Varieties of Democracy (V-Dem) Project **2020**; DOI:10.23696/vdemds20.
4. Bolt, J.; Inklaar, R.; de Jong, H.; Van Zander, J. L. Rebasing 'Maddison': New Income Comparisons and the Shape of Long-Run Economic Development. *GGDC Research Memorandum* **2018**, *174*.
5. IEA. Data and Statistics - Explore Energy Data by Category, Indicator, Country or Region. *International Energy Agency (IEA)* **2020**. Available online: <https://www.iea.org/data-and-statistics/data-tables?country=WORLD> (accessed on 11 May 2020).
6. The World Bank. Population Ages (% of Total Population) **2019**. Available online: <https://data.worldbank.org/indicator/SP.POP.0014.TO.ZS>, <https://data.worldbank.org/indicator/SP.POP.1564.TO.ZS> and <https://data.worldbank.org/indicator/SP.POP.65UP.TO.ZS> (accessed on 30 March 2020).
7. Kaufmann, D.; Kraay, A. Worldwide Governance Indicators **2016**. Available online: <http://info.worldbank.org/governance/wgi/> (accessed on 30 March 2020).
8. IFSWF. Our Members. International Forum of Sovereign Wealth Funds. Available online: <https://www.ifswf.org/our-members> (accessed on 30 March 2020).
