# Supplementary material for: Sovereign Wealth Funds as Sustainability Instruments? Disclosure of Sustainability Criteria in Worldwide Comparison
Source: MDPI journal article supplement (doi:10.3390/su13105565), 2021-05-17
Supplement: s1 [file s1]

## Appendix A1: Score Values Table

Table containing the additive score values for each of the considered SWFs. These additive score values are used as the dependent variables in the regression analysis. For each of the four pillars of sustainability, the encodings for the associated individual sustainability criteria (shown in Appendix A2) are added up using equal weights in order to obtain the environmental, the social, the governance and the economic score. The overall score is obtained via adding up the environmental, the social, the governance, and the economic score.

| Ref. Nr. | SWF      | environmental score | social score | governance score | economic score | overall score |
|----------|----------|---------------------|--------------|------------------|----------------|---------------|
| 1        | ADIA     | 1                   | 2            | 5                | 3              | 11            |
| 2        | AFF      | 1                   | 3            | 4                | 3              | 11            |
| 3        | CIC      | 0                   | 2            | 3                | 0              | 5             |
| 4        | GIC      | 1                   | 2            | 5                | 1              | 9             |
| 5        | GPF      | 3                   | 2            | 6                | 4              | 15            |
| 6        | HKMA     | 0                   | 0            | 6                | 1              | 7             |
| 7        | KIA      | 0                   | 1            | 5                | 0              | 6             |
| 8        | Mubadala | 2                   | 2            | 3                | 3              | 10            |
| 9        | KIC      | 2                   | 2            | 3                | 2              | 9             |
| 10       | Khazanah | 1                   | 3            | 5                | 2              | 11            |
| 11       | NDFI     | 0                   | 0            | 3                | 0              | 3             |
| 12       | NSIA     | 2                   | 3            | 3                | 2              | 10            |
| 13       | NZSF     | 3                   | 3            | 6                | 4              | 16            |
| 14       | PIF      | 3                   | 2            | 3                | 3              | 11            |
| 15       | QIA      | 0                   | 2            | 3                | 1              | 6             |
| 16       | SAFE     | 0                   | 0            | 1                | 0              | 1             |
| 17       | SAMA     | 0                   | 1            | 2                | 0              | 3             |
| 18       | FONSIS   | 3                   | 3            | 2                | 2              | 10            |
| 19       | SOFAZ    | 2                   | 2            | 3                | 2              | 9             |
| 20       | AP4      | 3                   | 2            | 6                | 2              | 13            |
| 21       | Temasek  | 3                   | 2            | 6                | 2              | 13            |
| 22       | ADIC     | 0                   | 2            | 2                | 0              | 4             |
| 23       | ATF      | 1                   | 2            | 2                | 1              | 6             |
| 24       | APFC     | 0                   | 0            | 3                | 1              | 4             |
| 25       | AHSTF    | 2                   | 2            | 3                | 3              | 10            |
| 26       | BDIC     | 0                   | 0            | 0                | 0              | 0             |
| 27       | BIA      | 0                   | 0            | 0                | 0              | 0             |
| 28       | CADFund  | 1                   | 2            | 2                | 3              | 8             |
| 29       | DFI      | 0                   | 0            | 0                | 0              | 0             |
| 30       | EIA      | 0                   | 0            | 2                | 0              | 2             |
| 31       | FEM      | 0                   | 0            | 0                | 0              | 0             |
| 32       | FAP      | 0                   | 0            | 3                | 0              | 3             |
| 33       | FSDEA    | 1                   | 3            | 3                | 2              | 9             |
| 34       | GPF      | 0                   | 2            | 0                | 1              | 3             |
| 35       | HSF      | 0                   | 0            | 2                | 0              | 2             |
| 36       | EFIB     | 1                   | 3            | 3                | 1              | 8             |
| 37       | ICD      | 0                   | 0            | 2                | 1              | 3             |

|    |         |   |   |   |   |    |
|----|---------|---|---|---|---|----|
| 38 | KNF     | 0 | 0 | 0 | 0 | 0  |
| 39 | LIA     | 0 | 0 | 0 | 0 | 0  |
| 40 | LEQTF   | 0 | 2 | 0 | 1 | 3  |
| 41 | MHC     | 1 | 2 | 3 | 2 | 8  |
| 42 | NIC NBK | 0 | 0 | 2 | 1 | 3  |
| 43 | NIC     | 0 | 0 | 2 | 0 | 2  |
| 44 | ISIF    | 3 | 4 | 6 | 3 | 16 |
| 45 | NSSF    | 0 | 0 | 1 | 0 | 1  |
| 46 | NMSIC   | 1 | 2 | 3 | 3 | 9  |
| 47 | NDLF    | 0 | 0 | 0 | 0 | 0  |
| 48 | ORSFM   | 0 | 0 | 0 | 0 | 0  |
| 49 | OIF     | 0 | 0 | 0 | 0 | 0  |
| 50 | CSF     | 0 | 1 | 1 | 0 | 2  |
| 51 | PIF     | 2 | 3 | 1 | 3 | 9  |
| 52 | PRF     | 0 | 1 | 2 | 0 | 3  |
| 53 | PSF     | 0 | 2 | 2 | 1 | 5  |
| 54 | PUF     | 0 | 1 | 1 | 0 | 2  |
| 55 | PF      | 0 | 0 | 3 | 0 | 3  |
| 56 | RRF     | 0 | 0 | 0 | 0 | 0  |
| 57 | RDIF    | 2 | 2 | 1 | 3 | 8  |
| 58 | RNWF    | 0 | 0 | 1 | 0 | 1  |
| 59 | RRF     | 0 | 0 | 0 | 0 | 0  |
| 60 | S-K JSC | 2 | 3 | 3 | 3 | 11 |
| 61 | SAM     | 0 | 0 | 0 | 0 | 0  |
| 62 | ESSF    | 0 | 0 | 2 | 0 | 2  |
| 63 | FSB     | 0 | 0 | 0 | 0 | 0  |
| 64 | SCIC    | 0 | 2 | 1 | 1 | 4  |
| 65 | SGRF    | 2 | 1 | 3 | 0 | 6  |
| 66 | TLPF    | 1 | 1 | 2 | 0 | 4  |
| 67 | TWF     | 0 | 0 | 2 | 0 | 2  |
| 68 | WVFF    | 1 | 0 | 0 | 1 | 2  |

## Appendix A2: Individual Criteria Encodings Table

Table containing the encodings for the presence or absence of the individual sustainability criteria for the SWFs. The presence of a criterion is coded with a “1” and the absence is coded with a “0”. These encodings are the basis for the additive score values shown in Appendix A1.

| Ref. Nr. | SWF      | Promotion of renewable energy | Reduction of fossil energy | Reduction of air, water, and soil pollution | Promotion of sustainable agriculture | Protection of human rights | Building human capital and/or education | Promotion of poverty reduction | Promotion of sustainable health services | Board composition and leadership | Risk management (financial) | Risk management (climate) | Business ethics | Transparency of investment | Responsible ownership | Promotion of sustainable innovations | Promotion of sustainable infrastructure | Prohibition to support unsustainable business practices | Support local economy | Investment to promote developing countries |
|----------|----------|-------------------------------|----------------------------|---------------------------------------------|--------------------------------------|----------------------------|-----------------------------------------|--------------------------------|------------------------------------------|----------------------------------|-----------------------------|---------------------------|-----------------|----------------------------|-----------------------|--------------------------------------|-----------------------------------------|---------------------------------------------------------|-----------------------|--------------------------------------------|
| 1        | ADIA     | 1                             | 0                          | 0                                           | 0                                    | 0                          | 1                                       | 0                              | 1                                        | 1                                | 1                           | 1                         | 1               | 0                          | 1                     | 0                                    | 1                                       | 0                                                       | 1                     | 1                                          |
| 2        | AFF      | 1                             | 0                          | 0                                           | 0                                    | 1                          | 1                                       | 0                              | 1                                        | 1                                | 1                           | 1                         | 0               | 0                          | 1                     | 1                                    | 1                                       | 1                                                       | 0                     | 0                                          |
| 3        | CIC      | 0                             | 0                          | 0                                           | 0                                    | 0                          | 0                                       | 1                              | 1                                        | 1                                | 1                           | 0                         | 1               | 0                          | 0                     | 0                                    | 0                                       | 0                                                       | 0                     | 0                                          |
| 4        | GIC      | 1                             | 0                          | 0                                           | 0                                    | 0                          | 1                                       | 0                              | 1                                        | 1                                | 1                           | 1                         | 1               | 0                          | 1                     | 0                                    | 1                                       | 0                                                       | 0                     | 0                                          |
| 5        | GPF      | 1                             | 1                          | 1                                           | 0                                    | 1                          | 0                                       | 0                              | 1                                        | 1                                | 1                           | 1                         | 1               | 1                          | 1                     | 1                                    | 1                                       | 1                                                       | 0                     | 1                                          |
| 6        | HKMA     | 0                             | 0                          | 0                                           | 0                                    | 0                          | 0                                       | 0                              | 0                                        | 1                                | 1                           | 1                         | 1               | 1                          | 1                     | 0                                    | 1                                       | 0                                                       | 0                     | 0                                          |
| 7        | KIA      | 0                             | 0                          | 0                                           | 0                                    | 0                          | 1                                       | 0                              | 0                                        | 1                                | 1                           | 1                         | 1               | 0                          | 1                     | 0                                    | 0                                       | 0                                                       | 0                     | 0                                          |
| 8        | Mubadala | 1                             | 0                          | 0                                           | 1                                    | 0                          | 1                                       | 0                              | 1                                        | 1                                | 1                           | 0                         | 1               | 0                          | 0                     | 1                                    | 1                                       | 0                                                       | 0                     | 1                                          |
| 9        | KIC      | 1                             | 0                          | 1                                           | 0                                    | 0                          | 1                                       | 0                              | 1                                        | 1                                | 1                           | 0                         | 1               | 0                          | 0                     | 0                                    | 1                                       | 0                                                       | 1                     | 0                                          |
| 10       | Khazanah | 0                             | 0                          | 0                                           | 1                                    | 0                          | 1                                       | 1                              | 1                                        | 1                                | 1                           | 0                         | 1               | 1                          | 1                     | 0                                    | 1                                       | 0                                                       | 1                     | 0                                          |
| 11       | NDFI     | 0                             | 0                          | 0                                           | 0                                    | 0                          | 0                                       | 0                              | 0                                        | 1                                | 1                           | 0                         | 1               | 0                          | 0                     | 0                                    | 0                                       | 0                                                       | 0                     | 0                                          |
| 12       | NSIA     | 1                             | 0                          | 0                                           | 1                                    | 0                          | 1                                       | 1                              | 1                                        | 1                                | 1                           | 0                         | 1               | 0                          | 0                     | 0                                    | 1                                       | 0                                                       | 1                     | 0                                          |
| 13       | NZSF     | 1                             | 1                          | 1                                           | 0                                    | 1                          | 0                                       | 1                              | 1                                        | 1                                | 1                           | 1                         | 1               | 1                          | 1                     | 1                                    | 1                                       | 1                                                       | 1                     | 0                                          |
| 14       | PIF      | 1                             | 0                          | 1                                           | 1                                    | 0                          | 1                                       | 0                              | 1                                        | 1                                | 1                           | 0                         | 0               | 1                          | 0                     | 1                                    | 1                                       | 0                                                       | 1                     | 0                                          |
| 15       | QIA      | 0                             | 0                          | 0                                           | 0                                    | 0                          | 1                                       | 0                              | 1                                        | 1                                | 1                           | 0                         | 1               | 0                          | 0                     | 0                                    | 0                                       | 0                                                       | 1                     | 0                                          |
| 16       | SAFE     | 0                             | 0                          | 0                                           | 0                                    | 0                          | 0                                       | 0                              | 0                                        | 1                                | 0                           | 0                         | 0               | 0                          | 0                     | 0                                    | 0                                       | 0                                                       | 0                     | 0                                          |
| 17       | SAMA     | 0                             | 0                          | 0                                           | 0                                    | 0                          | 1                                       | 0                              | 0                                        | 1                                | 1                           | 0                         | 0               | 0                          | 0                     | 0                                    | 0                                       | 0                                                       | 0                     | 0                                          |
| 18       | FONSIS   | 1                             | 0                          | 1                                           | 1                                    | 0                          | 1                                       | 1                              | 1                                        | 1                                | 1                           | 0                         | 0               | 0                          | 0                     | 0                                    | 1                                       | 0                                                       | 1                     | 0                                          |
| 19       | SOFAZ    | 1                             | 0                          | 1                                           | 0                                    | 0                          | 1                                       | 1                              | 0                                        | 1                                | 1                           | 0                         | 1               | 0                          | 0                     | 1                                    | 1                                       | 0                                                       | 0                     | 0                                          |
| 20       | AP4      | 1                             | 1                          | 1                                           | 0                                    | 1                          | 0                                       | 0                              | 1                                        | 1                                | 1                           | 1                         | 1               | 1                          | 1                     | 0                                    | 1                                       | 1                                                       | 0                     | 0                                          |
| 21       | Temasek  | 1                             | 0                          | 1                                           | 1                                    | 0                          | 1                                       | 0                              | 1                                        | 1                                | 1                           | 1                         | 1               | 1                          | 1                     | 1                                    | 1                                       | 0                                                       | 0                     | 0                                          |
| 22       | ADIC     | 0                             | 0                          | 0                                           | 0                                    | 0                          | 1                                       | 0                              | 1                                        | 1                                | 1                           | 0                         | 0               | 0                          | 0                     | 0                                    | 0                                       | 0                                                       | 0                     | 0                                          |
| 23       | ATF      | 0                             | 0                          | 1                                           | 0                                    | 0                          | 1                                       | 0                              | 1                                        | 1                                | 1                           | 0                         | 0               | 0                          | 0                     | 0                                    | 1                                       | 0                                                       | 0                     | 0                                          |
| 24       | APFC     | 0                             | 0                          | 0                                           | 0                                    | 0                          | 0                                       | 0                              | 0                                        | 1                                | 1                           | 0                         | 1               | 0                          | 0                     | 0                                    | 1                                       | 0                                                       | 0                     | 0                                          |
| 25       | AHSTF    | 1                             | 0                          | 0                                           | 1                                    | 0                          | 1                                       | 1                              | 0                                        | 1                                | 1                           | 0                         | 1               | 0                          | 0                     | 1                                    | 1                                       | 0                                                       | 1                     | 0                                          |
| 26       | BDIC     | 0                             | 0                          | 0                                           | 0                                    | 0                          | 0                                       | 0                              | 0                                        | 0                                | 0                           | 0                         | 0               | 0                          | 0                     | 0                                    | 0                                       | 0                                                       | 0                     | 0                                          |

|    |         |   |   |   |   |   |   |   |   |   |   |   |   |   |   |   |   |   |   |
|----|---------|---|---|---|---|---|---|---|---|---|---|---|---|---|---|---|---|---|---|
| 27 | BIA     | 0 | 0 | 0 | 0 | 0 | 0 | 0 | 0 | 0 | 0 | 0 | 0 | 0 | 0 | 0 | 0 | 0 | 0 |
| 28 | CADFund | 1 | 0 | 0 | 0 | 0 | 0 | 1 | 1 | 1 | 1 | 0 | 0 | 0 | 0 | 0 | 1 | 0 | 1 |
| 29 | DFI     | 0 | 0 | 0 | 0 | 0 | 0 | 0 | 0 | 0 | 0 | 0 | 0 | 0 | 0 | 0 | 0 | 0 | 0 |
| 30 | EIA     | 0 | 0 | 0 | 0 | 0 | 0 | 0 | 0 | 1 | 1 | 0 | 0 | 0 | 0 | 0 | 0 | 0 | 0 |
| 31 | FEM     | 0 | 0 | 0 | 0 | 0 | 0 | 0 | 0 | 0 | 0 | 0 | 0 | 0 | 0 | 0 | 0 | 0 | 0 |
| 32 | FAP     | 0 | 0 | 0 | 0 | 0 | 0 | 0 | 0 | 1 | 1 | 0 | 1 | 0 | 0 | 0 | 0 | 0 | 0 |
| 33 | FSDEA   | 0 | 0 | 1 | 0 | 0 | 1 | 1 | 1 | 1 | 1 | 0 | 1 | 0 | 0 | 0 | 1 | 0 | 1 |
| 34 | GPF     | 0 | 0 | 0 | 0 | 0 | 1 | 0 | 1 | 0 | 0 | 0 | 0 | 0 | 0 | 0 | 1 | 0 | 0 |
| 35 | HSF     | 0 | 0 | 0 | 0 | 0 | 0 | 0 | 0 | 1 | 1 | 0 | 0 | 0 | 0 | 0 | 0 | 0 | 0 |
| 36 | EFIB    | 0 | 0 | 0 | 1 | 0 | 1 | 1 | 1 | 1 | 1 | 0 | 1 | 0 | 0 | 0 | 1 | 0 | 0 |
| 37 | ICD     | 0 | 0 | 0 | 0 | 0 | 0 | 0 | 0 | 1 | 0 | 0 | 1 | 0 | 0 | 0 | 1 | 0 | 0 |
| 38 | KNF     | 0 | 0 | 0 | 0 | 0 | 0 | 0 | 0 | 0 | 0 | 0 | 0 | 0 | 0 | 0 | 0 | 0 | 0 |
| 39 | LIA     | 0 | 0 | 0 | 0 | 0 | 0 | 0 | 0 | 0 | 0 | 0 | 0 | 0 | 0 | 0 | 0 | 0 | 0 |
| 40 | LEQTF   | 0 | 0 | 0 | 0 | 0 | 1 | 0 | 1 | 0 | 0 | 0 | 0 | 0 | 0 | 0 | 1 | 0 | 0 |
| 41 | MHC     | 0 | 0 | 1 | 0 | 0 | 1 | 0 | 1 | 1 | 1 | 0 | 1 | 0 | 0 | 1 | 1 | 0 | 0 |
| 42 | NIC NBK | 0 | 0 | 0 | 0 | 0 | 0 | 0 | 0 | 1 | 1 | 0 | 0 | 0 | 0 | 0 | 1 | 0 | 0 |
| 43 | NIC     | 0 | 0 | 0 | 0 | 0 | 0 | 0 | 0 | 1 | 0 | 0 | 1 | 0 | 0 | 0 | 0 | 0 | 0 |
| 44 | ISIF    | 1 | 1 | 1 | 0 | 1 | 1 | 1 | 1 | 1 | 1 | 1 | 1 | 1 | 1 | 0 | 1 | 1 | 1 |
| 45 | NSSF    | 0 | 0 | 0 | 0 | 0 | 0 | 0 | 0 | 0 | 1 | 0 | 0 | 0 | 0 | 0 | 0 | 0 | 0 |
| 46 | NMSIC   | 0 | 0 | 1 | 0 | 0 | 1 | 0 | 1 | 1 | 1 | 0 | 1 | 0 | 0 | 1 | 1 | 0 | 1 |
| 47 | NDLF    | 0 | 0 | 0 | 0 | 0 | 0 | 0 | 0 | 0 | 0 | 0 | 0 | 0 | 0 | 0 | 0 | 0 | 0 |
| 48 | ORSFM   | 0 | 0 | 0 | 0 | 0 | 0 | 0 | 0 | 0 | 0 | 0 | 0 | 0 | 0 | 0 | 0 | 0 | 0 |
| 49 | OIF     | 0 | 0 | 0 | 0 | 0 | 0 | 0 | 0 | 0 | 0 | 0 | 0 | 0 | 0 | 0 | 0 | 0 | 0 |
| 50 | CSF     | 0 | 0 | 0 | 0 | 0 | 1 | 0 | 0 | 1 | 0 | 0 | 0 | 0 | 0 | 0 | 0 | 0 | 0 |
| 51 | PIF     | 1 | 0 | 1 | 0 | 0 | 1 | 1 | 1 | 1 | 0 | 0 | 0 | 0 | 0 | 1 | 1 | 0 | 1 |
| 52 | PRF     | 0 | 0 | 0 | 0 | 0 | 0 | 0 | 1 | 1 | 1 | 0 | 0 | 0 | 0 | 0 | 0 | 0 | 0 |
| 53 | PSF     | 0 | 0 | 0 | 0 | 0 | 1 | 0 | 1 | 1 | 1 | 0 | 0 | 0 | 0 | 0 | 1 | 0 | 0 |
| 54 | PUF     | 0 | 0 | 0 | 0 | 0 | 1 | 0 | 0 | 0 | 1 | 0 | 0 | 0 | 0 | 0 | 0 | 0 | 0 |
| 55 | PF      | 0 | 0 | 0 | 0 | 0 | 0 | 0 | 0 | 1 | 1 | 0 | 1 | 0 | 0 | 0 | 0 | 0 | 0 |
| 56 | RRF     | 0 | 0 | 0 | 0 | 0 | 0 | 0 | 0 | 0 | 0 | 0 | 0 | 0 | 0 | 0 | 0 | 0 | 0 |
| 57 | RDIF    | 1 | 0 | 1 | 0 | 0 | 0 | 1 | 1 | 1 | 0 | 0 | 0 | 0 | 0 | 1 | 1 | 0 | 1 |
| 58 | RNWF    | 0 | 0 | 0 | 0 | 0 | 0 | 0 | 0 | 0 | 1 | 0 | 0 | 0 | 0 | 0 | 0 | 0 | 0 |
| 59 | RRF     | 0 | 0 | 0 | 0 | 0 | 0 | 0 | 0 | 0 | 0 | 0 | 0 | 0 | 0 | 0 | 0 | 0 | 0 |
| 60 | S-K JSC | 1 | 0 | 1 | 0 | 0 | 1 | 1 | 1 | 1 | 1 | 0 | 1 | 0 | 0 | 1 | 1 | 0 | 1 |
| 61 | SAM     | 0 | 0 | 0 | 0 | 0 | 0 | 0 | 0 | 0 | 0 | 0 | 0 | 0 | 0 | 0 | 0 | 0 | 0 |
| 62 | ESSF    | 0 | 0 | 0 | 0 | 0 | 0 | 0 | 0 | 1 | 1 | 0 | 0 | 0 | 0 | 0 | 0 | 0 | 0 |
| 63 | FSB     | 0 | 0 | 0 | 0 | 0 | 0 | 0 | 0 | 0 | 0 | 0 | 0 | 0 | 0 | 0 | 0 | 0 | 0 |
| 64 | SCIC    | 0 | 0 | 0 | 0 | 0 | 1 | 0 | 1 | 1 | 0 | 0 | 0 | 0 | 0 | 0 | 1 | 0 | 0 |
| 65 | SGRF    | 1 | 0 | 0 | 1 | 0 | 0 | 0 | 1 | 1 | 1 | 0 | 1 | 0 | 0 | 0 | 0 | 0 | 0 |
| 66 | TLPF    | 1 | 0 | 0 | 0 | 0 | 0 | 0 | 1 | 1 | 1 | 0 | 0 | 0 | 0 | 0 | 0 | 0 | 0 |
| 67 | TWF     | 0 | 0 | 0 | 0 | 0 | 0 | 0 | 0 | 1 | 1 | 0 | 0 | 0 | 0 | 0 | 0 | 0 | 0 |
| 68 | WVFF    | 0 | 0 | 1 | 0 | 0 | 0 | 0 | 0 | 0 | 0 | 0 | 0 | 0 | 0 | 0 | 1 | 0 | 0 |

### **Appendix A3: Criteria Specifications**

Specifications of the requirements for encoding the presence of the individual sustainability criteria shown in Appendix A2. If the requirement for encoding a "1" is not fulfilled, a "0" is coded.

#### **"Promotion of renewable energy"**

Per definition, "renewable energies are energy sources that are continually replenished by nature and derived directly from the sun (such as thermal, photo-chemical, and photo-electric), indirectly from the sun (such as wind, hydropower, and photosynthetic energy stored in biomass), or from other natural movements and mechanisms of the environment (such as geothermal and tidal energy)" [1] (p. 749). For "Promotion of renewable energy", concrete investments into renewable energy facilities or commitments to promoting renewable energy are sufficient for coding a "1".

#### **"Reduction of fossil energy"**

"Reduction of fossil energy" means that a fund commits itself to reducing its exposure to fossil energy, i.e. to divesting from fossil energies or portfolio companies making substantial financial profits from fossil fuels. The final goal of fossil fuel divestment, as advocated by its proponents, is to "force the hand of the fossil fuel companies to leave the oil, gas, and coal reserves in the ground" [2] and to "pressure those companies to undergo transformative change that can cause a drastic reduction in carbon emissions" [2]. The criterion "Reduction of Fossil Fuel" requires an explicit commitment of the respective fund to divest from fossil energies or portfolio companies making substantial financial profits from fossil fuels for coding a "1".

#### **"Reduction of air, water, and soil pollution"**

Pollution is understood as "the addition of any substance (solid, liquid, or gas) or any form of energy (such as heat, sound, or radioactivity) to the environment at a rate faster than it can be dispersed, diluted, decomposed, recycled, or stored in some harmless form. The major kinds of pollution, usually classified by environment, are air pollution, water pollution, and land pollution" [3]. For coding a "1" for the criterion "Reduction of air, water, and soil pollution", statements to select portfolio companies, which only cause low pollution, are required or it is required to direct revenues of the fund into projects to deal with pollution. In addition, investments into companies, which are specified on alleviating pollution, are sufficient for coding a "1".

#### **"Promotion of sustainable agriculture"**

Per definition, sustainable agriculture is understood as "environmentally sound, economically viable, socially responsible, no exploitative, and which serves as the foundation for future generations" [4] (p. 5). For coding a "1" for the criterion "Promotion of sustainable agriculture", it is required to invest into portfolio companies, which are in the sustainable agriculture business or to direct revenues into related projects. However, also investments into innovative food and agriculture research with the potential to alleviate hunger while not inflicting environmental damage are sufficient for fulfilling this criterion.

#### **"Promotion of human rights"**

The term human rights has been coined in the The Universal Declaration of Human Rights by the UN [5]. For coding a "1" for the criterion "Promotion of human rights", the fund either has to ensure that its

portfolio companies do not violate human rights or it has to direct revenues into the promotion of human rights.

#### "Building human capital and/or education"

For coding a "1" for the criterion "Building human capital and/or education", the fund either has to invest into education or it has to direct revenues into education. It is important that these involvements of the funds lead to a benefit for a substantial number of people and are not merely limited to a privileged class.

#### "Promotion of poverty reduction"

For coding a "1" for the criterion "Promotion of poverty reduction", the fund either has to direct revenues into the alleviation of poverty or it has to create jobs, i.e. via its investments, for a substantial number of people, who would be living under poor conditions otherwise. Therefore, it is not fulfilled if only a few highly qualified jobs are created. The criterion is fulfilled for SWFs from developing countries with a mandate to create domestic jobs.

#### "Promotion of sustainable health services"

For coding a "1" for the criterion "Promotion of sustainable health services", there has to be investment or a direction of revenues into the healthcare sector or medical innovations. It is important that these involvements of the funds lead to a benefit for a substantial number of people and are not merely limited to a privileged class.

#### "Board composition and leadership"

For coding a "1" for the criterion "Board composition and leadership", the organizational structure of the fund as well as the responsible leaders of the fund have to be transparent. It is considered crucial that there are clear responsibilities as well as a functional organisation and operation for the fund to be able to tackle the challenge of sustainability.

#### "Risk management (financial)"

For a comprehensive elaboration on the topic of financial risk management, please refer to the related literature, e.g. [6]. For coding a "1" for the criterion "Risk management (financial)", there has to be an explicit statement that there is financial risk management for the fund or, even better, concrete risk management strategies are disclosed. It is considered crucial that there is a functional financial risk management for the fund to be operated in a stable way. A stable operation of the fund is fundamental to being able to tackle the challenge of sustainability.

#### "Risk management (climate)"

The criterion "Risk management (climate)" captures whether the consequences of climate change are included as a financial long-term risk. Climate change can potentially lead to unpredictable and substantial losses of value of ill-prepared funds in the near future. Funds, which recognize this risk, can prepare for such climate-related financial losses and can further reduce their own contribution to climate change. An explicit statement to include climate risk as a financial risk is required for coding a "1" for this criterion. This criterion is inspired by a best-practices proposal by the UN [7] and by the IFC, which already recognized climate risk in 2010 [8].

#### "Business ethics"

Business ethics generally refers to "the ethical dimensions of productive organizations and commercial activities" [9] and is therefore a very wide field. In the context of this work, it is explicitly checked in

terms of the internal organisation of the funds, i.e. that there are statements against bribery, insider trading, and sanctions for inappropriate behaviour. The criterion "Business ethics" captures whether a commitment to stick to acceptable business ethics is present. It is explicitly required that a catalogue with the ethical principles is present for coding a "1" rather than merely the mention of the term. Sound practices are expected to be the basis for a good operation of the fund and therefore also for the promotion of sustainability

#### "Transparency of investment"

The criterion "Transparency of investment" refers to the disclosure of the climate impact related to the investments of the fund. Disclosing the climate impact is expected to bring the climate-related behaviour of the fund under public scrutiny and is therefore a pressure point for the fund to reduce its climate footprint. This criterion is inspired by a best-practices proposal by the UN [7]. An explicit statement to disclose the climate impact of the fund is required for coding a "1".

#### "Responsible ownership"

"Responsible ownership" means that the fund exercises voting rights in order to make its portfolio companies more sustainable [10]. An explicit statement to exercise voting rights to make the portfolio companies more sustainable is required for coding a "1". This criterion is inspired by the practices of the Norwegian SWF.

#### "Promotion of sustainable innovations"

"Promotion of sustainable innovations" is specified in that the fund promotes or invests into innovations, which aim to meet sustainability goals [11]. These can be innovations in the fields of climate and energy, food, or medical innovations and are required to have the potential to lead to benefits for a substantial number of people. Generally, the margin for coding a "1" for this criterion is broadly defined due to the difficulty in predicting the actual potential of novel innovations.

#### "Promotion of sustainable infrastructure"

"Promotion of sustainable infrastructure" refers to investments into infrastructure, from which a substantial number of people can benefit. This is the requirement for coding a "1". For example, it can be housing, transportation systems, etc. However, luxury projects, which are limited to benefitting the privileged class, do not fulfil this criterion.

#### "Prohibition to support unsustainable business practices"

"Prohibition to support unsustainable business practices" means that the fund applies ethical exclusions and does not invest in unsustainable and unethical industries like weapons, tobacco, drugs, etc. [12]. An explicit statement that ethical exclusions are applied or a list of excluded companies is needed for coding a "1".

#### "Support local economy"

For the criterion "Support local economy", a "1" is coded if the fund promotes local economies. The promotion of local economy leads to a more decentralized economic structure. Functional local economies are expected to alleviate geographic economic disparities and further, transport routes can be reduced, which is more environmentally friendly. This criterion is inspired by proposals, which claim that "economic sustainability is best secured by the creation of local or regional self-reliant, community economies" [13] (p. 83) and which further point out "positive externalities of self-reliance and negative externalities of long-distance trade" [13] (p. 83).

"Investment to promote developing countries"

"Investment to promote developing countries", investment intended to generate an overall benefit for developing countries, is regarded as consistent with the concept of sustainability. If it is present, a "1" is coded for this criterion. However, funds from developing countries with the objective to promote their country of origin do not fulfil the criterion "Investment to Promote Developing Countries", since this is regarded rather as a national objective. In order to fulfil this criterion, funds from developing countries have to invest to promote other developing countries.

## References

1. Ellabban, O; Abu-Rub, H.; Blaabjerg, F. Renewable Energy Resources: Current Status, Future Prospects and Their Enabling Technology. *Renewable and Sustainable Energy Reviews* **2014**, 39, 748–764; DOI:<https://doi.org/10.1016/j.rser.2014.07.113>.
2. Ayling, J.; Gunningham, N. Non-State Governance and Climate Policy: The Fossil Fuel Divestment Movement. *Climate Policy* **2015**, 17(2), 131–149; DOI:<https://doi.org/10.1080/14693062.2015.1094729>.
3. Nathanson, J. A. Pollution. *Encyclopædia Britannica, inc.* **2020**, Available online: <https://www.britannica.com/science/pollution-environment> (accessed on 08 July 2020).
4. Allen, P.; Van Dusen, D.; Lundy, J.; Gliessman, S. Expanding the Definition of Sustainable Agriculture. *UC Santa Cruz: Center for Agroecology & Sustainable Food Systems* **1991**. Available online: <https://escholarship.org/uc/item/6cd573mh>.
5. United Nations. The Universal Declaration of Human Rights. *United Nations* **1948**, Available online: <https://www.un.org/en/universal-declaration-human-rights/> (accessed on 06 July 2020).
6. Christoffersen, P. Elements of Financial Risk Management. *Academic Press* **2003**.
7. United Nations. Financing Sustainable Development: The Role of Sovereign Wealth Funds for Green Investment. Working Paper. *United Nations Environment Programme Resources and Markets Branch* **2017**.
8. Stenek, V.; Amado, J.C.; Connell, R. Climate Risk and Financial Institutions. *International Finance Corporation (IFC). World Bank Group* **2010**, Available online: [https://www.ifc.org/wps/wcm/connect/topics\\_ext\\_content/ifc\\_external\\_corporate\\_site/climate+business/resources/climaterisk\\_financial\\_institutions](https://www.ifc.org/wps/wcm/connect/topics_ext_content/ifc_external_corporate_site/climate+business/resources/climaterisk_financial_institutions) (accessed on 9 July 2020).
9. Moriarty, J. Business Ethics. E. N. Zalta (Ed.), *The Stanford Encyclopedia of Philosophy (Fall 2017)*. *Metaphysics Research Lab, Stanford University* **2017**. Available online: <https://plato.stanford.edu/archives/fall2017/entries/ethicsbusiness/> (accessed on 08 July 2020).
10. Halvorsen, A.M. Addressing Climate Change Through the Norwegian Sovereign Wealth Fund (SWF) - Using Responsible Investments to Encourage Corporations to Take ESG Issues into Account in Their Decision-Making. *International and Comparative Corporate Law Journal, Forthcoming, University of Oslo Faculty of Law* **2010**, Research Paper No. 2010-06, Available online: <https://ssrn.com/abstract=1712799>.
11. Leach, M.; Rockström, J.; Raskin, P.; Scoones, I.; Stirling, A.C.; Smith, A.; Thompson, J.; Millstone, E.; Ely, A.; Arond, E.; Folke, C.; Olsson, P. Transforming Innovation for Sustainability. *Ecology and Society* **2012**, 17(2); DOI:<https://doi.org/10.5751/ES-04933-170211>.
12. Atta-Darkua, V. Corporate Ethical Behaviours and Firm Equity Value and Ownership: Evidence from the GPF's Ethical Exclusions **2020**. Available online: <https://ssrn.com/abstract=3388868>.
13. Curtis, F. Eco-Localism and Sustainability. *Ecological Economics* **2003**, 46(1), 83–102; DOI:[https://doi.org/10.1016/S0921-8009\(03\)00102-2](https://doi.org/10.1016/S0921-8009(03)00102-2).



## Appendix A4: Fund Documents

Overview over the official SWF documents, on which the encodings shown in Appendix A2 are based. Note that the documents are those available as of 30 March 2020.

1. Abu Dhabi - Abu Dhabi Investment Authority (ADIA):
  - Official website of the Abu Dhabi Investment Authority. Last checked on 30 March 2020, obtained from <https://www.adia.ae>.
2. Australia - Australian Future Fund (AFF):
  - Official website of the Australian Future Fund. Last checked on 30 March 2020, obtained from <https://www.futurefund.gov.au>.
  - *Investment vehicles and taxation arrangements*. Position Paper (2015). Last checked on 30 March 2020, obtained from <https://www.futurefund.gov.au/investment/how-we-invest/investment-policy-and-position-papers>.
  - *Investing for the Benefit of Future Generations of Australians*. Annual Report (2017-2018). Last checked on 30 March 2020, obtained from <https://www.futurefund.gov.au/about-us/annual-reports>.
  - *Management of Environmental, Social and Governance Issues*. Policy Paper (2017). Last checked on 30 March 2020, obtained from <https://www.futurefund.gov.au/investment/how-we-invest/esg>.
  - *Future Fund Board of Guardians - Statement of Investment Policies*. Policy Paper (2019). Last checked on 30 March 2020, obtained from <https://www.futurefund.gov.au/investment/how-we-invest/investment-policy-and-position-papers>.
  - *Exclusions under the Board's ownership rights and environmental, social and governance risk management policy*. List of excluded companies (2019). Last checked on 30 March 2020, obtained from <https://www.futurefund.gov.au/investment/how-we-invest/esg>.
  - *Future Fund Act 2006, Compilation No. 12*. Policy Paper (2016). Last checked on 30 March 2020, obtained from <https://www.legislation.gov.au/Details/C2016C00338>.
  - *Portfolio update at 30 September 2019*. Performance Report (2019). Last checked on 30 March 2020, obtained from <https://www.futurefund.gov.au/investment/investment-performance/portfolio-updates>.
3. China - China Investment Corporation (CIC):
  - Official website of the China Investment Corporation. Last checked on 30 March 2020, obtained from [http://www.china-inv.cn/chinainven/About\\_CIC/Who\\_We\\_Are.shtml](http://www.china-inv.cn/chinainven/About_CIC/Who_We_Are.shtml).
  - *China Investment Corporation 2018 Annual Report*. Annual Report (2018). Last checked on 30 March 2020, obtained from [http://www.china-inv.cn/chinainven/Media/Annual\\_Report.shtml](http://www.china-inv.cn/chinainven/Media/Annual_Report.shtml).
4. Singapore - Government of Singapore Investment Corporation (GIC):

- Official website of the Government of Singapore Investment Corporation. Last checked on 30 March 2020, obtained from <https://www.gic.com.sg/>.
  - *2018/2019 Report on the Management of the Government's Portfolio*. Annual Report (2018/2019). Last checked on 30 March 2020, obtained from <https://www.gic.com.sg/reports/>.
5. Norway - Government Pension Fund Global of Norway (GPF):
- Official website of the Government Pension Fund of Norway. Last checked on 30 March 2020, obtained from <https://www.nbim.no/>.
  - *Government Pension Fund Global Annual Report 2018*. Annual Report (2018). Last checked on 30 March 2020, obtained from <https://www.nbim.no/en/publications/reports/2018/annual-report-2018/>.
  - *Climate Change Strategy - Expectations towards Companies*. Policy Paper (2019). Last checked on 30 March 2020, obtained from <https://www.nbim.no/contentassets/acfd826a614145e296ed43d0a31fdcc0/climate-change-2019.pdf>.
  - *Responsible Investment - Government Pension Fund Global 2018*. Policy Paper (2018). Last checked on 30 March 2020, obtained from <https://www.nbim.no/en/publications/reports/2018/responsible-investment-2018/>.
  - *Strategy 2020–2022 - Norges Bank Investment Management*. Strategy Plan (2019). Last checked on 30 March 2020, obtained from <https://www.nbim.no/en/publications/strategy-for-the-fund-management/strategy-plan-2020-2022/>.
6. Hong Kong - Hong Kong Monetary Authority (HKMA):
- Official website of the Hong Kong Monetary Authority. Last checked on 30 March 2020, obtained from <https://www.hkma.gov.hk/eng/>.
  - *2018 Annual Report*. Annual Report (2018). Last checked on 30 March 2020, obtained from <https://www.hkma.gov.hk/eng/data-publications-and-research/publications/annual-report/>.
  - *Green Finance: Hong Kong's Unique Role*. Report (2018). Last checked on 30 March 2020, obtained from <https://www.hkma.gov.hk/media/eng/doc/key-information/insight/20180620e1a1.pdf>.
7. Kuwait - Kuwait Investment Authority (KIA):
- Official website of the Kuwait Investment Authority. Last checked on 30 March 2020, obtained from <https://kia.gov.kw/>.
8. Abu Dhabi - Mubadala Investment Company (Mubadala):
- Official website of the Mubadala Investment Company. Last checked on 30 March 2020, obtained from <https://www.mubadala.com/>.
  - *Annual Review 2018*. Annual Report (2018). Last checked on 30 March 2020. Obtained from <https://www.mubadala.com/annual-review-2018/en/index/>.
9. South Korea - Korea Investment Corporation (KIC):

- Official website of the Korea Investment Corporation. Last checked on 30 March 2020, obtained from <http://www.kic.kr/en/>.
- *Green and Sustainability Bond Framework of the Republic of Korea*. Report (2019). Last checked on 30 March 2020, obtained from [http://www.kic.kr/en/02/03/05.jsp?mode=view&article\\_no=55561&board\\_wrapper=%2Fen%2F02%2F03%2F05.jsp&pager.offset=0&board\\_no=66](http://www.kic.kr/en/02/03/05.jsp?mode=view&article_no=55561&board_wrapper=%2Fen%2F02%2F03%2F05.jsp&pager.offset=0&board_no=66).

10. Malaysia - Khazanah Nasional Berhad (Khazanah):

- Official website of the Khazanah Nasional Berhad. Last checked on 30 March 2020, obtained from <https://www.khazanah.com.my/Home>.
- *The Kazanah Report 2018 - Growing Malaysia's Long-Term Wealth*. Annual Report (2018). Last checked on 30 March 2020, obtained from <https://www.khazanah.com.my/Media-Downloads/Downloads>.
- *Code of Business Ethics*. Policy Paper. Last checked on 30 March 2020, obtained from <https://www.khazanah.com.my/Home>.
- *Investment Policy Statement*. Policy Paper (2019). Last checked on 30 March 2020, obtained from <https://www.khazanah.com.my/Home>.
- *Portfolio of Companies as at 31 December 2017, List is not exhaustive*. Report (2017). Last checked on 30 March 2020, obtained from <http://tkr.khazanah.com.my/2017/wp-content/uploads/2018/06/portfolios-of-companies-bi.pdf>.

11. Iran - National Development Fund of Iran (NDFI):

- Official website of the National Development Fund of Iran. Last checked on 30 March 2020, obtained from <http://en.ndf.ir/>.

12. Nigeria - Nigeria Sovereign Investment Authority (NSIA):

- Official website of the Nigeria Sovereign Investment Authority. Last checked on 30 March 2020, obtained from <http://nsia.com.ng/>.
- *Enabling Sustainable Growth: making an impact on Nigeria's future - Annual Report and Accounts 2018*. Annual Report (2018). Last checked on 30 March 2020, obtained from <https://nsia.com.ng/~nsia/downloads>.
- *Infrastructure Fund Investment Policy Statement as Approved on April 6, 2019*. Policy Paper (2019). Last checked on 30 March 2020, obtained from <http://www.nsia.com.ng/investments/nigeria-infrastructure-fund>.
- *Consolidated and separate financial statements for the year ended 31 December 2018*. Report (2019). Last checked on 30 March 2020, obtained from <http://nsia.com.ng/>.

13. New Zealand - New Zealand SuperFund (NZSF):

- Official website of the New Zealand Superannuation Fund. Last checked on 30 March 2020, obtained from <https://nzsuperfund.nz/>.
- *2019 Annual Report*. Annual Report (2019). Last checked on 30 March 2020, obtained from <https://nzsuperfund.nz/publications/annual-reports>.
- *"How We Invest" White Paper - Climate Change Investment Strategy by Matt Whineray and Anne-Maree O'Connor, March 2019*. Investment Statement (2019). Last checked on 30

March 2020, obtained from <https://nzsuperfund.nz/how-we-invest-balancing-risk-and-return/climate-change>.

- *Climate Change Strategy - Q&A*. Investment Risk Information Brochure (2016). Last checked on 30 March 2020, obtained from <https://nzsuperfund.nz/how-we-invest-balancing-risk-and-return-climate-change/climate-change-strategy>.

14. Saudi Arabia - Public Investment Fund of Saudi Arabia (PIF):

- Official website of the Public Investment Fund of Saudi Arabia. Last checked on 30 March 2020, obtained from <https://www.pif.gov.sa/en/Pages/About-PIF.aspx>.
- *The Public Investment Fund Program (2018-2020)*. Program Overview (2017). Last checked on 30 March 2020, obtained from <https://www.pif.gov.sa/en/Pages/Program.aspx>.

15. Qatar - Qatar Investment Authority (QIA):

- Official website of the Qatar Investment Authority. Last checked on 30 March 2020, obtained from <https://www.qia.qa/Investments/ManagingRisk.aspx>.
- *QIA Review 2016*. Annual Report (2016). Last checked on 30 March 2020, obtained from [https://www.ifswf.org/sites/default/files/annual-reports/QIA%202016\\_0.pdf](https://www.ifswf.org/sites/default/files/annual-reports/QIA%202016_0.pdf).

16. China - State Administration of Foreign Exchange (SAFE):

- Official website of the State Administration of Foreign Exchange. Last checked on 30 March 2020, obtained from <https://www.safe.gov.cn/en/>.

17. Saudi Arabia - Saudi Arabian Monetary Authority (SAMA):

- Official website of the Saudi Arabian Monetary Authority. Last checked on 30 March 2020, obtained from <http://www.sama.gov.sa/en-US/Pages/default.aspx>.

18. Senegal - Senegal Strategic Investment Fund (FONSIS):

- Official website of the Senegal Strategic Investment Fund. Last checked on 30 March 2020, obtained from <https://www.fonsis.org/en>.
- *Rapport Annual*. Annual Report in French (2018). Last checked on 30 March 2020, obtained from <https://www.fonsis.org/en/you-are-investor/annual-reports>.

19. Azerbaijan - State Oil Fund of the Republic of Azerbaijan (SOFAZ):

- Official website of the State Oil Fund of the Republic of Azerbaijan. Last checked on 30 March 2020, obtained from <https://www.oilfund.az/en>.
- *2016 Annual Report*. Annual Report (2016). Last checked on 30 March 2020, obtained from <https://www.oilfund.az/en/report-and-statistics/report-archive>.

20. Sweden - Fourth Swedish National Pension Fund (AP4):

- Official website of the Fourth Swedish National Pension Fund. Last checked on 30 March 2020, obtained from <https://www.ap4.se/en/>.
- *Annual Report 2018*. Annual Report (2018). Last checked on 30 March 2020, obtained from <https://www.ap4.se/en/reports/>.

21. Singapore - Temasek Holdings (Temasek):

- Official website of Temasek Holdings. Last checked on 30 March 2020, obtained from <https://www.temasek.com.sg/en/index>.

- *Temasek Review 2016 - Generational Investing*. Annual Report (2016). Last checked on 30 March 2020, obtained from [https://www.temasek.com.sg/content/dam/temasek-corporate/our-financials/investor-library/annual-review/en-tr-thumbnail-and-pdf/TR2016\\_Singles.pdf](https://www.temasek.com.sg/content/dam/temasek-corporate/our-financials/investor-library/annual-review/en-tr-thumbnail-and-pdf/TR2016_Singles.pdf).
22. Abu Dhabi - Abu Dhabi Investment Council (ADIC):
- Official website of the Abu Dhabi Investment Council. Last checked on 30 March 2020, obtained from <https://www.adcouncil.ae/>.
23. Alabama - Alabama Trust Fund (ATF):
- Official website of the Alabama Trust Fund. Last checked on 30 March 2020, obtained from <https://treasury.alabama.gov/alabama-trust-fund/>.
  - *The Alabama Trust Fund The State's Most Valuable Financial Asset - 2018 Annual Report*. Annual Report (2018). Last checked on 30 March 2020, obtained from <https://treasury.alabama.gov/alabama-trust-fund/>.
  - *Alabama County & Municipal Government Capital Improvement Trust Fund - Third Quarter Executive Summary* by Annoesjka West, Senior Vice President. Executive Summary (2017). Last checked on 30 March 2020, obtained from <https://treasury.alabama.gov/alabama-trust-fund/>.
  - *History of the Alabama Trust Fund*. Report. Last checked on 30 March 2020, obtained from <https://web.archive.org/web/20120911123246/http://www.treasury.state.al.us/Content/Documents/History%20of%20the%20Alabama%20Trust%20Fund%2006222012.pdf>.
  - *Amendments and Acts Summary of the Alabama Trust Fund*. Report. Last checked on 30 March 2020, obtained from <https://treasury.alabama.gov/alabama-trust-fund/#>.
24. Alaska - Alaska Permanent Fund Corporation (APFC):
- Official website of the Alaska Permanent Fund Corporation. Last checked on 30 March 2020, obtained from <https://apfc.org/>.
  - *Balance - Annual Report 2019, APFC Alaska Permanent Fund Corporation*. Annual Report (2019). Last checked on 30 March 2020, obtained from <https://apfc.org/report-archive/#12-annual-reports>.
25. Canada - Alberta Heritage Savings Trust Fund (AHSTF):
- Official website of the Alberta Heritage Savings Trust Fund. Last checked on 30 March 2020, obtained from <https://www.alberta.ca/heritage-savings-trust-fund.aspx>.
  - *2018–19 Annual Report Alberta Heritage Savings Trust Fund*. Annual Report (2018-2019). Last checked on 30 March 2020, obtained from <https://open.alberta.ca/publications/0702-9721>.
  - *Alberta Heritage Savings Trust Fund - Statement of Investment Policy and Goals*. Policy Statement (2011). Last checked on 30 March 2020, obtained from <https://open.alberta.ca/dataset/e22f96c4-e162-4366-9cac-e75764cad12c>.
26. Nigeria - Bayelsa Development and Investment Corporation (BDIC):
- No official website or annual report could be obtained. Accordingly, all considered criteria have to be coded with a zero.

27. Brunei - Brunei Investment Agency (BIA):

- Official website of the Brunei Investment Agency. Last checked on 30 March 2020, obtained from <https://www.mofe.gov.bn/Brunei%20Investment%20Agency/Home.aspx>. Note that this website did not provide information about the considered criteria, as of 30 March 2020. Accordingly, all considered criteria have to be coded with a zero.

28. China - China-Africa Development Fund (CADFund):

- Official website of the China-Africa Development Fund. Last checked on 30 March 2020, obtained from <http://en.cadfund.com/>.

29. Iraq - Development Fund for Iraq (DFI):

- No official website or annual report could be obtained. Accordingly, all considered criteria have to be coded with a zero.

30. United Arab Emirates (Federal) - Emirates Investment Authority (EIA):

- Official website of the Emirates Investment Authority. Last checked on 30 March 2020, obtained from <https://www.eia.gov.ae/>.
- *Emirates Investment Authority - Inaugural Report*. Inaugural Report (2017). Last checked on 30 March 2020, obtained from [https://www.eia.gov.ae/?page\\_id=895](https://www.eia.gov.ae/?page_id=895).

31. Venezuela - Macroeconomic Stabilization Fund (FEM):

- No official website or annual report could be obtained. Accordingly, all considered criteria have to be coded with a zero.

32. Panama - Fondo de Ahorro de Panama (FAP):

- Official website of the Fondo de Ahorro de Panama. Last checked on 30 March 2020, obtained from <https://www.fondoahorropanama.com/>. Note that, as of 30 March 2020, this website is in Spanish. Accordingly, an automated translation into English was applied.
- *Annual Report 2018*. Annual Report (2018). Last checked on 30 March 2020, obtained from <https://www.fondoahorropanama.com/financiero>. Note that, as of 30 March 2020, this document is in Spanish. Accordingly, an automated translation into English was applied.
- *Fondo de Ahorro de Panama (Panama, Republic of Panama) - Financial Statements December 31, 2018*. Report (2018). Last checked on 30 March 2020, obtained from <https://www.fondoahorropanama.com/financiero>.

33. Angola - Fundo Soberano de Angola (FSDEA):

- Official website of the Fundo Soberano de Angola. Last checked on 30 March 2020, obtained from <https://fundosoberano.ao/en/>.

34. Ghana - Ghana Petroleum Funds (GPF):

- *Republic of Ghana, Ministry of Finance, 2018 Annual Report on the Petroleum Funds, Presented to Parliament on Wednesday, 15th November 2018 by Kenn Ofori-Atta, Minister for Finance as Part of the Presentation of the 2019 Budget Statement and Economic Policy and, in Consonance with Section 48 of*

*the Petroleum Revenue Management Act, 2011 (Act 815), as Amended (Act 893). Annual Report (2018). Last checked on 30 March 2020, obtained from <https://www.mofep.gov.gh/publications/petroleum-reports>.*

35. Trinidad and Tobago - Heritage and Stabilization Fund (HSF):

- *Heritage and Stabilisation Fund (HSF) Annual Report 2018: Preserving our Heritage. Annual Report (2018). Last checked on 30 March 2020, obtained from <https://www.finance.gov.tt/category/reports/heritage-and-stabilization-fund/>.*

36. Idaho - Endowment Fund Investment (EFIB)

- Official website of the Endowment Fund Investment (EFIB). Last checked on 30 March 2020, obtained from <https://efib.idaho.gov/>.
- *August 2019 Endowment Fund Investment Board Second Quarter 2019 Performance Review, Paul Erlendson, Senior Vice President. Performance Report (2019). Last checked on 30 March 2020, obtained from <https://efib.idaho.gov/reports/>.*
- *Request for Proposals for an Investment Consultant - Idaho Endowment Fund Investment Board, State Insurance Fund and the Idaho Department of Lands. Last checked on 30 March 2020, obtained from <https://efib.idaho.gov/wp-content/uploads/sites/95/2019/04/Investment-Consultant-RFP-2019-Final-1-1.pdf>.*
- *Endowment Fund Investment Board - Commingled Pool Investment Policy. Policy Paper (2019). Last checked on 30 March 2020, obtained from <https://efib.idaho.gov/related-codes/>.*

37. Dubai - Investment Corporation of Dubai (ICD):

- Official website of the Investment Corporation of Dubai. Last checked on 30 March 2020, obtained from <https://www.icd.gov.ae/>.
- *Investment Corporation of Dubai and its subsidiaries, Interim Condensed Consolidated Financial Statements (Unaudited) for the Six-Month Period Ended 30 June 2019. Report (2019). Last checked on 30 March 2020, obtained from <https://www.icd.gov.ae/investor-relations/financial-statements-annual-reports/>.*

38. Kazakhstan - Kazakhstan National Fund (KNF):

- No official website or annual report could be obtained. Accordingly, all considered criteria have to be coded with a zero.

39. Libya - Libyan Investment Authority (LIA):

- Official website of the Libyan Investent Authorits is located at <http://www.lia.ly/ar/>. Note that, as of 30 March 2020, this website is in Arabic.

40. Louisiana - Louisiana Education Quality Trust Fund (LEQTF):

- Official website of the Louisiana Education Quality Trust Fund. Last checked on 30 March 2020, obtained from <https://www.treasury.la.gov/investments>.
- *The Kevin P. Reilly, Sr. Louisiana Education Quality Trust Fund 2019 Annual Report. Annual Report (2019). Last checked on 30 March 2020, obtained from <https://www.treasury.la.gov/investments>.*

- *Louisiana Education Quality Trust Fund, Annual Report Fiscal Year 2004, Prepared by John Kennedy, State Treasurer. Annual Report (2004).* Last checked on 30 March 2020, obtained from <https://eric.ed.gov/?id=ED483581>.
41. Bahrain - Mumtalakat Holding Company (MHC):
- Official website of the Mumtalakat Holding Company. Last checked on 30 March 2020, obtained from <https://mumtalakat.bh/>.
42. Kazakhstan - National Investment Corporation of the National Bank of Kazakhstan (NIC NBK):
- Official website of the National Investment Corporation of the National Bank of Kazakhstan. Last checked on 30 March 2020, obtained from <https://nicnbk.kz/>.
43. Abu Dhabi - National Investment Corporation (NIC):
- Official website of the National Investment Corporation. Last checked on 30 March 2020, obtained from <http://www.nicuae.ae/en/>.
44. Ireland - Ireland Strategic Investment Fund (ISIF):
- Official website of the Ireland Strategic Investment Fund. Last checked on 30 March 2020, obtained from <https://isif.ie/>.
  - *RI Transparency Report 2019 Ireland Strategic Investment Fund (ISIF). Report (2019).* Last checked on 30 March 2020, obtained from <https://isif.ie/how-we-invest/responsible-investment/overview>.
  - *Fossil Fuel Divestment Act 2018. Policy Paper (2019).* Last checked on 30 March 2020, obtained from <https://isif.ie/how-we-invest/responsible-investment/overview>.
  - *Ireland Strategic Investment Fund - Sustainability and Responsible Investment Strategy. Policy Paper (2017).* Last checked on 30 March 2020, obtained from <https://isif.ie/how-we-invest/responsible-investment/overview>.
  - *Project Ireland 2040 Building Ireland's Future - The First Year: Annual Report 2018. Annual Report (2018).* Last checked on 30 March 2020, obtained from <https://www.gov.ie/en/publication/b684c6-project-ireland-2040-annual-report-2019/>.
45. China - National Social Security Fund (NSSF):
- Official website of the National Social Security Fund. Last checked on 30 March 2020, obtained from [http://www.ssf.gov.cn/Eng\\_Introduction/201206/t20120620\\_5603.html](http://www.ssf.gov.cn/Eng_Introduction/201206/t20120620_5603.html).
46. New Mexico - New Mexico State Investment Council (NMSIC):
- Official website of the New Mexico State Investment Council. Last checked on 30 March 2020, obtained from <https://www.sic.state.nm.us/>.
  - *New Mexico State Investment Council - 60 Years Anniversary Report 2018. Report (2018).* Last checked on 30 March 2020, obtained from <https://www.sic.state.nm.us/60-years-anniversary-report-2018.aspx>.
47. North Dakota - North Dakota Legacy Fund (NDLF):
- Official website of the North Dakota Legacy Fund. Last checked on 30 March 2020, obtained from <https://www.treasurer.nd.gov/north-dakota-legacy-fund-0>.



- *Biennial Report of the North Dakota State Treasurer: July 1, 2017 - June 30, 2019*. Biennial Report (2017-2019). Last checked on 30 March 2020, obtained from <https://www.treasurer.nd.gov/biennial-reports>.
48. Mexico - Oil Revenues Stabilization Fund of Mexico (ORSFM):
- No official website or annual report could be obtained. Accordingly, all considered criteria have to be coded with a zero.
49. Oman - Oman Investment Fund (OIF):
- Official website of the Oman Investment Fund. Last checked on 30 March 2020, obtained from <http://www.oif.om/>.
50. Oregon - Common School Fund (CSF):
- Official website of the Common School Fund. Last checked on 30 March 2020, obtained from <https://www.oregon.gov/dsl/About/Pages/AboutCSF.aspx>.
  - *Common School Fund Annual Financial Report Fiscal Year ending June 30, 2018*. Annual Report (2018). Last checked on 30 March 2020, obtained from <https://www.oregon.gov/dsl/About/Pages/AgencyPub.aspx>.
51. Palestine - Palestine Investment Fund (PIF):
- Official website of the Palestine Investment Fund. Last checked on 30 March 2020, obtained from <http://www.pif.ps/?lang=en>.
  - *Palestine Investment Fund - Investing for Impact: Annual Report 2018*. Annual Report (2018). Last checked on 30 March 2020, obtained from <https://www.ifswf.org/sites/default/files/annual-reports/PIF-annual-2018-ENGLISH.pdf>.
52. Chile - Pension Reserve Fund (PRF):
- Official website of the Pension Reserve Fund. Last checked on 30 March 2020, obtained from <https://www.hacienda.cl/english/sovereign-wealth-funds/pension-reserve-fund.html>.
  - *2018 Annual Report Sovereign Wealth Funds, Ministry of Finance*. Annual Report (2018). Last checked on 30 March 2020, obtained from <https://www.hacienda.cl/english/sovereign-wealth-funds/annual-report.html>.
53. Texas - Permanent School Fund (PSF):
- Official website of the Permanent School Fund. Last checked on 30 March 2020, obtained from <https://tea.texas.gov/finance-and-grants/texas-permanent-school-fund>.
  - *Texas Permanent School Fund - Comprehensive Annual Financial Report for the Fiscal Year Ending August 31, 2018*. Annual Report (2018). Last checked on 30 March 2020, obtained from <https://tea.texas.gov/finance-and-grants/texas-permanent-school-fund/texas-permanent-school-fund-annual-report>.
  - *Texas Permanent School Fund - All Public Market Holdings Fiscal Year Ending August 31, 2018*. Financial Report (2018). Last checked on 30 March 2020, obtained from <https://tea.texas.gov/finance-and-grants/texas-permanent-school-fund/texas-permanent-school-fund-holdings>.

54. Texas - Permanent University Fund (PUF):

- Official website of the Permanent University Fund. Last checked on 30 March 2020, obtained from <https://www.utsystem.edu/puf>.
- *Financial Statements and Independent Auditors' Report Permanent University Fund Years Ended August 31, 2019 and 2018*. Report (2019). Last checked on 30 March 2020, obtained from <https://www.utimco.org/reports/permanent-university-fund/>.
- *Permanent University Fund - Report on Certain Specified Data as Required by Texas Government Code Ch. 2101 Subchapter D December 31, 2019*. Report (2019). Last checked on 30 March 2020, obtained from <https://www.utimco.org/reports/permanent-university-fund/>.

55. Botswana - Pula Fund (PF):

- Official website of the Pula Fund. Last checked on 30 March 2020, obtained from <https://www.bankofbotswana.bw/content/pula-fund>.
- *Case Study: Botswana's Management of the Pula Fund Observance of the Santiago Principles*. Last checked on 30 March 2020, obtained from <https://www.bankofbotswana.bw/content/pula-fund>.

56. Algeria - Revenue Regulation Fund (RRF):

- No official website or annual report could be obtained. Accordingly, all considered criteria have to be coded with a zero.

57. Russia - Russian Direct Investment Fund (RDIF):

- Official website of the Russian Direct Investment Fund. Last checked on 30 March 2020, obtained from [https://rdif.ru/Eng\\_About/](https://rdif.ru/Eng_About/).

58. Russia - Russian National Wealth Fund (RNWF):

- Official website of the Russian National Wealth Fund. Last checked on 30 March 2020, obtained from <https://www.minfin.ru/en/key/nationalwealthfund/>.

59. Russia - Russian Reserve Fund (RRF):

- Note that the Russian Reserve Fund is no longer in operation. Accordingly, all considered criteria had to be coded with a zero.

60. Kazakhstan - Samruk-Kazyna JSC (S-K JSC):

- Official website of Samruk-Kazyna JSC. Last checked on 30 March 2020, obtained from <https://sk.kz/about-fund/?lang=en>.
- Further website related to Samruk-Kazyna JSC. Last checked on 30 March 2020, obtained from <https://www.samruk-kazyna.kz/>.
- *Welcome to the future - Sustainability Report 2017*. Last checked on 30 March 2020, obtained from <https://sk.kz/sustainable-development/>.
- *2018 Sustainability Report*. Report (2018). Last checked on 30 March 2020, obtained from <https://sk.kz/about-fund/otchety-i-plany/?temp=full&iblock=51&id=209&year=2019>.

- *Corporate Governance Code of the Sovereign Wealth Fund "Samruk-Kazyna" JSC*. Last checked on 30 March 2020, obtained from <https://sk.kz/about-fund/corporate-governance/>.
- *Risk Management Policy of "Samruk-Kazyna" JSC*. Policy Paper (2013). Last checked on 30 March 2020, obtained from <https://www.sk.kz/upload/iblock/4ac/4ac6f2d1cd0ce1fcd562c2a80f7baa1f.pdf>.

61. Sharjah - Sharjah Asset Management (SAM):

- No official website or annual report could be obtained. Accordingly, all considered criteria have to be coded with a zero.

62. Chile - Economic and Social Stabilisation Fund (ESSF):

- Official website of the Economic and Social Stabilisation Fund. Last checked on 30 March 2020, obtained from <https://www.hacienda.cl/english/sovereign-wealth-funds/economic-and-social-stabilization-fund.html>.
- *2018 Annual Report Sovereign Wealth Funds, Ministry of Finance*. Annual Report (2018). Last checked on 30 March 2020, obtained from <https://www.hacienda.cl/english/sovereign-wealth-funds/annual-report.html>.

63. Brazil - Fundo Soberano do Brasil (FSB):

- As of 30 March 2020, the Fundo Soberano do Brasil is no longer in operation. No official website or annual report could be obtained. Accordingly, all considered criteria have to be coded with a zero.

64. Vietnam - State Capital Investment Corporation (SCIC):

- Official website of the State Capital Investment Corporation. Last checked on 30 March 2020, obtained from <http://www.scic.vn/english/>.

65. Oman - State General Reserve Fund (SGRF):

- Official website of the State General Reserve Fund. Last checked on 30 March 2020, obtained from <https://www.sgrf.gov.om/Index.php?r=en%2Fsite%2Findex>.

66. Timor-Leste - Timor-Leste Petroleum Fund (TLPF):

- Official website of the Timor-Leste Petroleum Fund. Last checked on 30 March 2020, obtained from <https://www.mof.gov.tl/budget-spending/petroleum-fund/>.
- *August 2018, Petroleum Fund Annual Report Financial Year 2017 - Petroleum Fund Administration Unit, Ministry of Finance, Democratic Republic of Timor-Leste*. Annual Report (2018). Last checked on 30 March 2020, obtained from <https://www.mof.gov.tl/category/documents-and-forms/petroleum-fund-documents/petroleum-fund-annual-reports/?lang=en>.
- *Statement of Investment Beliefs and Principles - Investment Advisory Board, Petroleum Fund of Timor-Leste*. Policy Paper (2014). Last checked on 30 March 2020, obtained from [https://www.mof.gov.tl/wp-content/uploads/2011/11/IAB\\_Statement\\_of\\_Investment\\_Beliefs\\_and\\_Principles\\_Updated.pdf](https://www.mof.gov.tl/wp-content/uploads/2011/11/IAB_Statement_of_Investment_Beliefs_and_Principles_Updated.pdf).

67. Turkey - Turkey Wealth Fund (TWF):

- Official website of the Turkey Wealth Fund. Last checked on 30 March 2020, obtained from <http://turkiyevarikfonu.com.tr/EN>.

68. West Virginia - West Virginia Future Fund (WVFF):

- Official website of the West Virginia Future Fund. Last checked on 30 March 2020, obtained from <http://www.wvlegislature.gov/wvcode/ChapterEntire.cfm?chap=11&art=13A&section=5B>.
