# Supplementary material for: Sovereign Wealth Funds as Sustainability Instruments? Disclosure of Sustainability Criteria in Worldwide Comparison
Source: MDPI journal article supplement (doi:10.3390/su13105565), 2021-05-17
Supplement: s1 [file s1]

|                               | <i>Dependent variable:</i> |                   |                     |                    |                     |
|-------------------------------|----------------------------|-------------------|---------------------|--------------------|---------------------|
|                               | environmental_score        | social_score      | governance_score    | economic_score     | overall_score       |
|                               | (1)                        | (2)               | (3)                 | (4)                | (5)                 |
| no_pension_fund               | -0.077<br>(0.474)          | -0.032<br>(0.521) | -0.695<br>(0.553)   | -0.036<br>(0.566)  | -0.840<br>(1.734)   |
| AUM                           | -0.574<br>(0.685)          | -0.429<br>(0.754) | 2.026*<br>(0.800)   | -0.560<br>(0.819)  | 0.463<br>(2.509)    |
| origin_of_funding             | 0.782*<br>(0.331)          | 0.896*<br>(0.364) | 0.668<br>(0.387)    | 0.844*<br>(0.396)  | 3.191*<br>(1.213)   |
| e_migdppc                     | -0.001<br>(0.008)          | 0.004<br>(0.009)  | 0.001<br>(0.010)    | 0.002<br>(0.010)   | 0.006<br>(0.031)    |
| crude_oil_exports             | -0.004*<br>(0.002)         | -0.003<br>(0.002) | -0.002<br>(0.002)   | -0.004*<br>(0.002) | -0.014*<br>(0.007)  |
| pop_ages_over_65              | -0.031<br>(0.038)          | -0.044<br>(0.042) | -0.067<br>(0.045)   | -0.001<br>(0.046)  | -0.144<br>(0.141)   |
| v2x_polyarchy                 | 0.602<br>(0.615)           | 0.757<br>(0.677)  | 0.550<br>(0.718)    | 0.367<br>(0.736)   | 2.275<br>(2.253)    |
| e_wbgi_gee                    | 0.402<br>(0.250)           | 0.358<br>(0.275)  | 1.141***<br>(0.292) | 0.497<br>(0.299)   | 2.396*<br>(0.916)   |
| IFSWF_membership              | 0.699*<br>(0.284)          | 0.796*<br>(0.312) | 1.817***<br>(0.331) | 0.746*<br>(0.339)  | 4.059***<br>(1.039) |
| Constant                      | -0.184<br>(0.616)          | 0.164<br>(0.678)  | 1.257<br>(0.719)    | -0.193<br>(0.737)  | 1.044<br>(2.256)    |
| Observations                  | 58                         | 58                | 58                  | 58                 | 58                  |
| R <sup>2</sup>                | 0.291                      | 0.312             | 0.677               | 0.306              | 0.495               |
| Adjusted R <sup>2</sup>       | 0.158                      | 0.182             | 0.617               | 0.176              | 0.401               |
| Residual Std. Error (df = 48) | 0.965                      | 1.062             | 1.127               | 1.154              | 3.534               |
| F Statistic (df = 9; 48)      | 2.191*                     | 2.413*            | 11.189***           | 2.355*             | 5.237***            |

Note:

Signif. codes: '\*\*\*' p < 0.001, '\*\*' p < 0.01, '\*' p < 0.05
